# Supplementary material for: Associations between Exposure to Bisphenol A and Behavioral and Cognitive Function in Children with Attention-deficit/Hyperactivity Disorder: A Case-control Study
Source: PubMed Central journal article supplement — Clin Psychopharmacol Neurosci. 2020 May 31;18(2):261–9. doi: 10.9758/cpn.2020.18.2.261 (PMC7242102; doi:10.9758/cpn.2020.18.2.261), 2020-05-31
Supplement: CPN-18-261_Supple.pdf [file CPN-18-261_Supple.pdf]

**Supplementary Table 1.** Behavioral and cognitive characteristics according to the urinary bisphenol A concentration in boys

| Tertile group of urine bisphenol A | Q1 (n = 101) | Q2 (n = 97) | Q3 (n = 98) | F     | <i>p</i> value |
|------------------------------------|--------------|-------------|-------------|-------|----------------|
| <b>K-ARS</b>                       |              |             |             |       |                |
| Total                              | 10.9 ± 11.5  | 15.9 ± 12.1 | 18.6 ± 11.4 | 11.45 | < 0.001**      |
| Hyperactivity-Impulsivity          | 4.5 ± 5.3    | 7.2 ± 6.2   | 8.1 ± 5.8   | 10.47 | < 0.001**      |
| Inattention                        | 6.3 ± 6.6    | 8.8 ± 6.5   | 10.5 ± 6.4  | 10.33 | < 0.001**      |
| <b>BASC-2</b>                      |              |             |             |       |                |
| Hyperactivity                      | 46.4 ± 9.3   | 50.7 ± 12.4 | 50.7 ± 11   | 5.21  | 0.006**        |
| Aggression                         | 46.2 ± 7.8   | 48.7 ± 10.3 | 48.5 ± 7.9  | 2.48  | 0.085          |
| Conduct problems                   | 46.2 ± 9.0   | 50.4 ± 10.5 | 49.0 ± 10.1 | 4.60  | 0.011*         |
| Anxiety                            | 41.5 ± 7.0   | 43.3 ± 7.9  | 44.4 ± 8.0  | 3.80  | 0.024*         |
| Depression                         | 47.1 ± 8.5   | 49.6 ± 9.7  | 50.2 ± 9.1  | 3.21  | 0.042*         |
| Somatization                       | 44.2 ± 9.1   | 43.8 ± 8.0  | 45.1 ± 8.3  | 0.64  | 0.528          |
| Atypicality                        | 47.9 ± 8.2   | 49.9 ± 11.0 | 51.1 ± 10.7 | 2.60  | 0.076          |
| Withdrawal                         | 48.4 ± 8.9   | 50.0 ± 10.2 | 50.4 ± 9.2  | 1.22  | 0.296          |
| Attention problems                 | 52.2 ± 10.6  | 55.3 ± 11.7 | 54.7 ± 10.3 | 2.30  | 0.103          |
| Adaptability                       | 49.2 ± 8.5   | 48.4 ± 10.2 | 48.9 ± 8.8  | 0.22  | 0.804          |
| Social skills                      | 43.5 ± 9.4   | 42.6 ± 10.1 | 43.5 ± 9.8  | 0.31  | 0.734          |
| Leadership                         | 44.7 ± 9.0   | 43.8 ± 9.4  | 44.8 ± 9.4  | 0.30  | 0.741          |
| Activities of daily living         | 46.3 ± 10.1  | 44.1 ± 10.3 | 43.3 ± 11.1 | 2.17  | 0.116          |
| Functional communication           | 50.1 ± 8.6   | 45.9 ± 11.2 | 45.5 ± 10.1 | 6.21  | 0.002**        |
| Externalizing problems             | 45.8 ± 8.6   | 49.9 ± 11.5 | 49.4 ± 9.5  | 4.94  | 0.008**        |
| Internalizing problems             | 42.8 ± 8.1   | 44.5 ± 8.6  | 45.8 ± 8.7  | 2.92  | 0.055          |
| Behavioral symptom index           | 47.4 ± 9.0   | 50.9 ± 11.0 | 51.2 ± 9.8  | 4.43  | 0.013*         |
| Adaptive skills                    | 46.2 ± 8.4   | 44.0 ± 10.0 | 44.4 ± 9.6  | 1.47  | 0.231          |
| <b>ADS</b>                         |              |             |             |       |                |
| Visual omission error              | 55.7 ± 20.0  | 62.5 ± 25.3 | 66.1 ± 35.3 | 3.57  | 0.029*         |
| Visual commission error            | 58.0 ± 21.4  | 60.9 ± 20.3 | 69.7 ± 27.8 | 6.52  | 0.002**        |
| Visual response time               | 50.1 ± 12.6  | 49.5 ± 12.4 | 50.3 ± 15.4 | 0.08  | 0.924          |
| Visual response time variability   | 57.9 ± 16.9  | 63.4 ± 23.8 | 67.7 ± 28.8 | 4.16  | 0.017*         |
| Auditory omission error            | 50.4 ± 11.8  | 52.5 ± 15.2 | 53.8 ± 18.4 | 1.19  | 0.305          |
| Auditory commission error          | 48.5 ± 12.3  | 50.3 ± 14.4 | 55.7 ± 21.9 | 4.83  | 0.009**        |
| Auditory response time             | 56.3 ± 17.4  | 57.2 ± 16.6 | 54.5 ± 18.4 | 0.57  | 0.569          |
| Auditory response time variability | 53.4 ± 13.6  | 57.2 ± 15.1 | 57.9 ± 14.5 | 2.73  | 0.067          |

Values are presented as mean ± standard deviation.

K-ARS, Korean version of the Attention Deficit/Hyperactivity Disorder Rating Scale; BASC-2, Behavior Assessment System for Children, Second Edition; ADS, Attention Deficit/Hyperactivity Disorder Diagnostic System.

\**p* < 0.05; \*\**p* < 0.01.

**Supplementary Table 2.** Behavioral and cognitive characteristics according to the urinary bisphenol A concentration in girls

| Tertile group of urine bisphenol A | Q1 (n = 47) | Q2 (n = 50) | Q3 (n = 51) | F    | <i>p</i> value |
|------------------------------------|-------------|-------------|-------------|------|----------------|
| K-ARS                              |             |             |             |      |                |
| Total                              | 13.9 ± 13.2 | 13.8 ± 11.4 | 15.1 ± 11.8 | 0.18 | 0.837          |
| Hyperactivity-Impulsivity          | 5.9 ± 5.9   | 6.1 ± 5.2   | 6.7 ± 6.0   | 0.25 | 0.776          |
| Inattention                        | 8.0 ± 7.6   | 7.8 ± 6.5   | 8.4 ± 6.2   | 0.13 | 0.880          |
| BASC                               |             |             |             |      |                |
| Hyperactivity                      | 51.0 ± 11.4 | 50.4 ± 9.7  | 53.1 ± 10.9 | 0.84 | 0.432          |
| Aggression                         | 48.0 ± 8.5  | 49.5 ± 7.6  | 50.7 ± 8.9  | 1.28 | 0.280          |
| Conduct problems                   | 50.1 ± 11.3 | 47.8 ± 8.6  | 50.3 ± 9.6  | 0.97 | 0.382          |
| Anxiety                            | 42.6 ± 8.4  | 42.3 ± 8.0  | 44.1 ± 9.7  | 0.63 | 0.534          |
| Depression                         | 48.5 ± 9.6  | 49.8 ± 9.4  | 53.2 ± 10.9 | 2.91 | 0.058          |
| Somatization                       | 45.3 ± 9.6  | 43.5 ± 8.2  | 47.9 ± 11.8 | 2.43 | 0.092          |
| Atypicality                        | 50.6 ± 9.6  | 51.0 ± 11.1 | 52.3 ± 11.5 | 0.31 | 0.733          |
| Withdrawal                         | 49.0 ± 8.5  | 50.3 ± 10.3 | 50.9 ± 9.8  | 0.54 | 0.582          |
| Attention problems                 | 55.3 ± 11.5 | 54.3 ± 10.5 | 56.8 ± 9.6  | 0.71 | 0.495          |
| Adaptability                       | 46.3 ± 9.3  | 47.8 ± 9.1  | 45.5 ± 9.9  | 0.77 | 0.465          |
| Social skills                      | 43.4 ± 6.7  | 42.9 ± 8.5  | 41.0 ± 7.3  | 1.44 | 0.240          |
| Leadership                         | 43.6 ± 8.5  | 44.4 ± 8.6  | 42.8 ± 9.0  | 0.41 | 0.662          |
| Activities of daily living         | 44.9 ± 11.6 | 45.7 ± 10.0 | 43.2 ± 11.8 | 0.63 | 0.533          |
| Functional communication           | 46.7 ± 10.3 | 46.5 ± 11.4 | 43.1 ± 11.3 | 1.69 | 0.189          |
| Externalizing problems             | 49.6 ± 10.4 | 49.2 ± 8.6  | 51.5 ± 9.6  | 0.83 | 0.440          |
| Internalizing problems             | 44.3 ± 9.8  | 44.0 ± 8.4  | 48.1 ± 12.1 | 2.43 | 0.092          |
| Behavioral symptom index           | 50.5 ± 9.9  | 51.1 ± 9.5  | 53.6 ± 9.9  | 1.35 | 0.263          |
| Adaptive skills                    | 44.2 ± 8.3  | 44.8 ± 8.9  | 42.1 ± 8.9  | 1.33 | 0.268          |
| ADS                                |             |             |             |      |                |
| Visual omission error              | 59.5 ± 22.4 | 53.1 ± 15.1 | 62.1 ± 24.8 | 2.37 | 0.097          |
| Visual commission error            | 53.7 ± 21.3 | 50.9 ± 15.3 | 56.6 ± 23.2 | 1.01 | 0.366          |
| Visual response time               | 52.3 ± 13.5 | 54.4 ± 10.5 | 53.7 ± 12.9 | 0.38 | 0.687          |
| Visual response time variability   | 58.9 ± 21.6 | 56.6 ± 16.3 | 59.3 ± 20.9 | 0.27 | 0.763          |
| Auditory omission error            | 53.7 ± 12.2 | 50.0 ± 14.4 | 51.9 ± 14.5 | 0.89 | 0.412          |
| Auditory commission error          | 48.4 ± 8.5  | 45.9 ± 13.2 | 48.6 ± 17.6 | 0.63 | 0.535          |
| Auditory response time             | 61.5 ± 14.3 | 60.0 ± 10.7 | 58.3 ± 14.4 | 0.73 | 0.485          |
| Auditory response time variability | 58.9 ± 14.1 | 57.3 ± 13.1 | 59.5 ± 13.2 | 0.37 | 0.692          |

Values are presented as mean ± standard deviation.

K-ARS, Korean version of the Attention Deficit/Hyperactivity Disorder Rating Scale; BASC-2, Behavior Assessment System for Children, Second Edition; ADS, Attention Deficit/Hyperactivity Disorder Diagnostic System.

**Supplementary Table 3.** Behavioral and cognitive characteristics according to the urinary bisphenol A concentration in control group

| Tertile group of urine bisphenol A | Q1 (n = 93) | Q2 (n = 82) | Q3 (n = 74) | F    | <i>p</i> value |
|------------------------------------|-------------|-------------|-------------|------|----------------|
| <b>K-ARS</b>                       |             |             |             |      |                |
| Total                              | 5.4 ± 8.6   | 8.1 ± 8.7   | 9.9 ± 9.4   | 5.41 | 0.005**        |
| Hyperactivity-Impulsivity          | 2.1 ± 3.9   | 3.5 ± 4.4   | 4.1 ± 4.6   | 4.62 | 0.011*         |
| Inattention                        | 3.3 ± 5.0   | 4.6 ± 4.7   | 5.8 ± 5.3   | 5.35 | 0.005**        |
| <b>BASC-2</b>                      |             |             |             |      |                |
| Hyperactivity                      | 43.5 ± 7.6  | 45.7 ± 9.3  | 47.3 ± 10.2 | 3.63 | 0.028*         |
| Aggression                         | 43.7 ± 5.2  | 46.1 ± 8.4  | 47.2 ± 7.6  | 5.19 | 0.006**        |
| Conduct problems                   | 43.3 ± 5.8  | 45.6 ± 8.6  | 46.8 ± 9.3  | 4.23 | 0.016*         |
| Anxiety                            | 40.9 ± 6.9  | 42.9 ± 7.4  | 43.8 ± 8.7  | 3.18 | 0.043*         |
| Depression                         | 44.6 ± 6.8  | 47.0 ± 8.3  | 48.7 ± 9.2  | 5.27 | 0.006**        |
| Somatization                       | 42.4 ± 7.5  | 43.3 ± 7.6  | 45.3 ± 10.6 | 2.40 | 0.093          |
| Atypicality                        | 46.0 ± 6.5  | 47.5 ± 10   | 48.8 ± 9.6  | 2.22 | 0.111          |
| Withdrawal                         | 47.8 ± 8.1  | 50.4 ± 11.3 | 49.1 ± 9.3  | 1.52 | 0.221          |
| Attention problems                 | 48.7 ± 9.4  | 49.8 ± 9.7  | 51.1 ± 10.6 | 1.18 | 0.309          |
| Adaptability                       | 49.6 ± 8.9  | 50.1 ± 9.9  | 50.3 ± 9.1  | 0.13 | 0.874          |
| Social skills                      | 44.5 ± 8.3  | 45.1 ± 9.6  | 44.9 ± 9.1  | 0.09 | 0.911          |
| Leadership                         | 45.2 ± 8.7  | 45.8 ± 9.4  | 46.5 ± 9.0  | 0.41 | 0.664          |
| Activities of daily living         | 50.0 ± 8.8  | 48.8 ± 9.5  | 47.5 ± 11.4 | 1.29 | 0.277          |
| Functional communication           | 51.5 ± 8.6  | 48.7 ± 11.1 | 47.9 ± 10.0 | 3.01 | 0.051          |
| Externalizing problems             | 42.8 ± 5.8  | 45.3 ± 9.0  | 46.8 ± 9.0  | 5.27 | 0.006**        |
| Internalizing problems             | 40.9 ± 7.0  | 43.0 ± 7.9  | 45.0 ± 10.4 | 4.70 | 0.010*         |
| Behavioral symptom index           | 44.5 ± 7.0  | 47.1 ± 9.6  | 48.3 ± 9.4  | 4.18 | 0.016*         |
| Adaptive skills                    | 47.9 ± 7.8  | 47.3 ± 9.8  | 47.1 ± 9.2  | 0.17 | 0.846          |
| <b>ADS</b>                         |             |             |             |      |                |
| Visual omission error              | 51.9 ± 15.1 | 53.0 ± 21.0 | 52.7 ± 18.0 | 0.08 | 0.923          |
| Visual commission error            | 50.5 ± 14.9 | 51.9 ± 14.7 | 54.8 ± 23.6 | 1.19 | 0.306          |
| Visual response time               | 50.8 ± 10.7 | 49.3 ± 10.8 | 51.3 ± 12.8 | 0.63 | 0.534          |
| Visual response time variability   | 52.9 ± 13.9 | 52.6 ± 16.5 | 53.4 ± 18.5 | 0.05 | 0.953          |
| Auditory omission error            | 48.9 ± 10.5 | 45.1 ± 8.9  | 46.2 ± 11.4 | 3.22 | 0.042*         |
| Auditory commission error          | 45.9 ± 9.1  | 44.1 ± 11.5 | 46.7 ± 18.5 | 0.80 | 0.450          |
| Auditory response time             | 57.6 ± 16.1 | 57.4 ± 12.7 | 56.4 ± 14.2 | 0.15 | 0.860          |
| Auditory response time variability | 51.2 ± 12.7 | 51.7 ± 10.4 | 54.6 ± 13.9 | 1.59 | 0.205          |

Values are presented as mean ± standard deviation.

K-ARS, Korean version of the Attention Deficit/Hyperactivity Disorder Rating Scale; BASC-2, Behavior Assessment System for Children, Second Edition; ADS, Attention Deficit/Hyperactivity Disorder Diagnostic System.

\**p* < 0.05; \*\**p* < 0.01.

**Supplementary Table 4.** Behavioral and cognitive characteristics according to the urinary bisphenol A concentration in ADHD group

| Tertile group of urine bisphenol A | Q1 (n = 55) | Q2 (n = 65) | Q3 (n = 75) | F    | <i>p</i> value |
|------------------------------------|-------------|-------------|-------------|------|----------------|
| K-ARS                              |             |             |             |      |                |
| Total                              | 22.7 ± 8.9  | 24.2 ± 8.8  | 24.9 ± 8.3  | 1.06 | 0.348          |
| Hyperactivity-Impulsivity          | 9.7 ± 4.5   | 11.0 ± 4.8  | 11.1 ± 4.9  | 1.59 | 0.206          |
| Inattention                        | 12.9 ± 5.3  | 13.2 ± 5.1  | 13.7 ± 4.8  | 0.43 | 0.652          |
| BASC-2                             |             |             |             |      |                |
| Hyperactivity                      | 55.0 ± 10.0 | 56.8 ± 11.2 | 55.8 ± 10.1 | 0.44 | 0.646          |
| Aggression                         | 51.9 ± 9.2  | 52.7 ± 9.5  | 51.4 ± 8.4  | 0.35 | 0.704          |
| Conduct problems                   | 54.2 ± 11.7 | 54.4 ± 9.4  | 52.1 ± 9.9  | 1.00 | 0.370          |
| Anxiety                            | 43.4 ± 8.2  | 43.1 ± 8.6  | 44.9 ± 8.4  | 0.90 | 0.409          |
| Depression                         | 52.3 ± 9.8  | 53.1 ± 10.0 | 53.8 ± 9.9  | 0.33 | 0.718          |
| Somatization                       | 48.0 ± 10.8 | 44.2 ± 8.6  | 46.8 ± 8.6  | 2.76 | 0.066          |
| Atypicality                        | 53.4 ± 9.9  | 53.6 ± 11.3 | 54.2 ± 11.6 | 0.10 | 0.905          |
| Withdrawal                         | 49.9 ± 9.6  | 49.8 ± 8.6  | 52.2 ± 9.2  | 1.46 | 0.234          |
| Attention problems                 | 60.7 ± 9.2  | 61.5 ± 9.5  | 59.9 ± 7.2  | 0.55 | 0.578          |
| Adaptability                       | 46.2 ± 8.4  | 45.8 ± 9.3  | 45.1 ± 8.8  | 0.26 | 0.772          |
| Social skills                      | 41.7 ± 8.9  | 39.7 ± 8.7  | 40.4 ± 8.5  | 0.85 | 0.427          |
| Leadership                         | 42.9 ± 8.8  | 41.8 ± 8.3  | 41.6 ± 9.0  | 0.34 | 0.715          |
| Activities of daily living         | 39.0 ± 9.7  | 39.4 ± 8.4  | 39.0 ± 9.6  | 0.05 | 0.954          |
| Functional communication           | 44.8 ± 8.9  | 42.8 ± 10.7 | 41.4 ± 10.1 | 1.86 | 0.158          |
| Externalizing problems             | 54.1 ± 9.8  | 55.1 ± 9.9  | 53.5 ± 9.0  | 0.50 | 0.604          |
| Internalizing problems             | 47.3 ± 9.7  | 46.1 ± 8.9  | 48.2 ± 9.4  | 0.89 | 0.412          |
| Behavioral symptom index           | 54.9 ± 9.2  | 55.8 ± 9.5  | 55.9 ± 8.9  | 0.21 | 0.809          |
| Adaptive skills                    | 41.7 ± 8.0  | 40.5 ± 8.0  | 40.1 ± 8.2  | 0.65 | 0.521          |
| ADS                                |             |             |             |      |                |
| Visual omission error              | 65.2 ± 25.8 | 67.2 ± 22.6 | 76.6 ± 38.1 | 2.72 | 0.069          |
| Visual commission error            | 66.7 ± 26.3 | 64.5 ± 22.1 | 75.4 ± 26.2 | 3.66 | 0.027*         |
| Visual response time               | 50.9 ± 15.9 | 53.6 ± 13.0 | 51.6 ± 16.3 | 0.51 | 0.600          |
| Visual response time variability   | 67.0 ± 21.6 | 71.8 ± 22.9 | 75.9 ± 28.6 | 2.01 | 0.137          |
| Auditory omission error            | 55.7 ± 13.1 | 60.0 ± 16.8 | 59.7 ± 19.1 | 1.21 | 0.301          |
| Auditory commission error          | 52.7 ± 12.8 | 54.8 ± 14.9 | 59.5 ± 20.8 | 2.77 | 0.065          |
| Auditory response time             | 58.6 ± 17.5 | 59.0 ± 17.3 | 55.3 ± 19.7 | 0.87 | 0.421          |
| Auditory response time variability | 61.7 ± 13.7 | 64.1 ± 15.8 | 62.2 ± 13.3 | 0.48 | 0.619          |

Values are presented as mean ± standard deviation.

ADHD, attention deficit hyperactivity disorder; K-ARS, Korean version of the Attention Deficit/Hyperactivity Disorder Rating Scale; BASC-2, Behavior Assessment System for Children, Second Edition; ADS, Attention Deficit/Hyperactivity Disorder Diagnostic System.

\**p* < 0.05.
